# Supplementary material for: Genomic Epidemiology of the SARS-CoV-2 Epidemic in Cyprus from November 2020 to October 2021: The Passage of Waves of Alpha and Delta Variants of Concern
Source: MDPI journal article supplement (doi:10.3390/v15010108), 2022-12-30
Supplement: s1 [file s1]

Table S1. Common S-protein Mutations of B.1.258 & sublineages, Alpha (B.1.1.7 & Q. sublineages), and Delta (B.1.617.2 & AY. sublineages) that were Identified in this Dataset<sup>a</sup>.

| Total Sequences <sup>b</sup> | Lineage <sup>c</sup> | Mutations and Number of Sequences Identified for Each Mutation |                    |                    |                    |                    |       |       |       |       |        |                    |
|------------------------------|----------------------|----------------------------------------------------------------|--------------------|--------------------|--------------------|--------------------|-------|-------|-------|-------|--------|--------------------|
| 258                          | B.1.258              | ΔH69                                                           | ΔV70               | N439K              | D614G              |                    |       |       |       |       |        |                    |
|                              |                      | 258                                                            | 258                | 258                | 258                |                    |       |       |       |       |        |                    |
| 3                            | B.1.258.17           | ΔH69                                                           | ΔV70               | L189F              | N439K              | D614G              | V772I |       |       |       |        |                    |
|                              |                      | 3                                                              | 3                  | 3                  | 3                  | 3                  | 3     |       |       |       |        |                    |
| 2                            | B.1.258.22           | A67V                                                           | ΔH69               | ΔV70               | N439K              | D614G              |       |       |       |       |        |                    |
|                              |                      | 2                                                              | 2                  | 2                  | 2                  | 2                  |       |       |       |       |        |                    |
| 690                          | B.1.1.7              | ΔH69                                                           | ΔV70               | ΔY144              | N501Y              | A570D              | D614G | P681H | T716I | S982A | D1118H |                    |
|                              |                      | 690                                                            | 690                | 689                | 686                | 679                | 690   | 676   | 689   | 690   | 690    |                    |
| 1                            | Q.8                  | ΔH69                                                           | ΔV70               | ΔY144              | N501Y              | A570D              | D614G | P681H | T716I | S982A | D1118H |                    |
|                              |                      | 1                                                              | 1                  | 1                  | 1                  | 1                  | 1     | 1     | 1     | 1     | 1      |                    |
| 41                           | B.1.617.2            | T19R                                                           | G142D <sup>d</sup> | ΔE156 <sup>e</sup> | ΔF157 <sup>e</sup> | R158G <sup>e</sup> | L452R | T478K | D614G | P681R | D950N  |                    |
|                              |                      | 41                                                             | 18                 | 41                 | 41                 | 41                 | 41    | 41    | 41    | 41    | 40     | 41                 |
| 1                            | AY.1                 | T19R                                                           | W258L              | K417N              | T478K              | D614G              | P681R | D950N |       |       |        |                    |
|                              |                      | 1                                                              | 1                  | 1                  | 1                  | 1                  | 1     | 1     |       |       |        |                    |
| 56                           | AY.4                 | T19R                                                           | T95I               | G142D <sup>d</sup> | ΔE156              | ΔF157              | R158G | L452R | T478K | D614G | P681R  | D950N              |
|                              |                      | 56                                                             | 54                 | 20                 | 54                 | 54                 | 54    | 56    | 56    | 56    | 50     | 56                 |
| 2                            | AY.4.2               | T19R                                                           | T95I               | Y145H              | ΔE156              | ΔF157              | R158G | A222V | L452R | T478K | D614G  | P681R              |
|                              |                      | 2                                                              | 2                  | 2                  | 2                  | 2                  | 2     | 2     | 2     | 2     | 2      | 2                  |
|                              |                      | D950N                                                          |                    |                    |                    |                    |       |       |       |       |        |                    |
|                              |                      | 2                                                              |                    |                    |                    |                    |       |       |       |       |        |                    |
| 1                            | AY.4.3               | T19R                                                           | P26S               | T95I               | ΔE156              | ΔF157              | R158G | L452R | T478K | D614G | P681R  | D950N              |
|                              |                      | 1                                                              | 1                  | 1                  | 1                  | 1                  | 1     | 1     | 1     | 1     | 1      | 1                  |
| 3                            | AY.4.4               | L5F                                                            | T19R               | T95I <sup>d</sup>  | G142D <sup>d</sup> | ΔE156              | ΔF157 | R158G | L452R | T478K | D614G  | P681R <sup>d</sup> |
|                              |                      | 3                                                              | 3                  | 2                  | 1                  | 3                  | 3     | 3     | 3     | 3     | 3      | 2                  |
|                              |                      | S929T <sup>d</sup>                                             | D950N              |                    |                    |                    |       |       |       |       |        |                    |
|                              |                      | 2                                                              | 3                  |                    |                    |                    |       |       |       |       |        |                    |
| 1                            | AY.4.5               | T19R                                                           | T95I               | G142D              | ΔE156              | ΔF157              | R158G | L452R | T478K | D614G | P681R  | D950N              |
|                              |                      | 1                                                              | 1                  | 1                  | 1                  | 1                  | 1     | 1     | 1     | 1     | 1      | 1                  |
|                              |                      | D1259Y                                                         |                    |                    |                    |                    |       |       |       |       |        |                    |
| 1                            | AY.5                 | 1                                                              |                    |                    |                    |                    |       |       |       |       |        |                    |
|                              |                      | T19R                                                           | ΔE156              | ΔF157              | R158G              | L452R              | T478K | D614G | P681R | D950N |        |                    |
| 2                            | AY.6                 | 1                                                              | 1                  | 1                  | 1                  | 1                  | 1     | 1     | 1     | 1     |        |                    |
|                              |                      | T19R                                                           | G142D <sup>d</sup> | ΔE156              | ΔF157              | R158G              | L452R | T478K | D614G | P681R | D950N  |                    |
| 1                            | AY.7                 | 2                                                              | 1                  | 2                  | 2                  | 2                  | 2     | 2     | 2     | 2     | 2      |                    |
|                              |                      | T19R                                                           | G142D              | ΔE156              | ΔF157              | R158G              | L452R | T478K | D614G | P681R | D950N  |                    |
| 1                            | AY.7.2               | 1                                                              | 1                  | 1                  | 1                  | 1                  | 1     | 1     | 1     | 1     | 1      |                    |
|                              |                      | T19R                                                           | G142D <sup>f</sup> | ΔE156              | ΔF157              | R158G              | L452R | T478K | D614G | D950N |        |                    |
| 6                            | AY.9                 | 1                                                              | 1                  | 1                  | 1                  | 1                  | 1     | 1     | 1     | 1     |        |                    |
|                              |                      | T19R                                                           | G142D <sup>d</sup> | ΔE156              | ΔF157              | R158G              | A222V | L452R | T478K | D614G | P681R  | D950N              |
| 5                            | AY.9.2               | 6                                                              | 3                  | 6                  | 6                  | 6                  | 6     | 6     | 6     | 6     | 5      | 6                  |
|                              |                      | T19R                                                           | G142D <sup>d</sup> | ΔE156              | ΔF157              | R158G              | A222V | L452R | T478K | D614G | P681R  | D950N              |
| 1                            | AY.23                | 5                                                              | 3                  | 5                  | 5                  | 5                  | 5     | 5     | 5     | 5     | 4      | 5                  |
|                              |                      | T19R                                                           | G142D              | ΔE156              | ΔF157              | R158G              | L452R | T478K | D614G | D950N | V1264L |                    |

|     |         |          |                    |                    |       |       |                    |       |       |                    |                    |        |
|-----|---------|----------|--------------------|--------------------|-------|-------|--------------------|-------|-------|--------------------|--------------------|--------|
|     |         | 1        | 1                  | 1                  | 1     | 1     | 1                  | 1     | 1     | 1                  | 1                  |        |
| 1   | AY.25.1 | T19R     | ΔE156              | ΔF157              | R158G | L452R | T478K              | D614G | P681R | D950N              |                    |        |
|     |         | 1        | 1                  | 1                  | 1     | 1     | 1                  | 1     | 1     | 1                  |                    |        |
| 1   | AY.34.1 | T19R     | T95I               | ΔE156              | ΔF157 | R158G | L452R              | T478K | D614G | Q677H              | P681R              | D950N  |
|     |         | 1        | 1                  | 1                  | 1     | 1     | 1                  | 1     | 1     | 1                  | 1                  | 1      |
|     |         | S:L1265F |                    |                    |       |       |                    |       |       |                    |                    |        |
|     |         | 1        |                    |                    |       |       |                    |       |       |                    |                    |        |
| 1   | AY.36   | T19R     | T95I               | ΔE156              | ΔF157 | R158G | L452R              | T478K | D614G | P681R              | D950N              | V1104L |
|     |         | 1        | 1                  | 1                  | 1     | 1     | 1                  | 1     | 1     | 1                  | 1                  | 1      |
| 1   | AY.42   | T19R     | T95I               | L452R              | T478K | D614G | P681R              | D950N |       |                    |                    |        |
|     |         | 1        | 1                  | 1                  | 1     | 1     | 1                  | 1     |       |                    |                    |        |
| 43  | AY.43   | T19R     | G142D <sup>d</sup> | ΔE156              | ΔF157 | R158G | L452R              | T478K | D614G | P681R              | D950N              |        |
|     |         | 43       | 13                 | 43                 | 43    | 43    | 43                 | 43    | 43    | 40                 | 43                 |        |
| 2   | AY.44   | T19R     | ΔE156              | ΔF157              | R158G | L452R | T478K              | D614G | P681R | D950N              |                    |        |
|     |         | 2        | 2                  | 2                  | 2     | 2     | 2                  | 2     | 2     | 2                  |                    |        |
| 1   | AY.46   | T19R     | G142D              | ΔE156              | ΔF157 | R158G | L452R              | T478K | D614G | P681R              | D950N              |        |
|     |         | 1        | 1                  | 1                  | 1     | 1     | 1                  | 1     | 1     | 1                  | 1                  |        |
| 3   | AY.46.6 | T19R     | E96Q <sup>f</sup>  | ΔE156              | ΔF157 | R158G | A222S <sup>f</sup> | L452R | T478K | D614G              | P681R              | D950N  |
|     |         | 3        | 3                  | 3                  | 3     | 3     | 3                  | 3     | 3     | 3                  | 3                  | 3      |
| 125 | AY.60   | T19R     | G142D <sup>f</sup> | ΔE156              | ΔF157 | R158G | A222V              | L452R | T478K | D614G              | P681R              | D950N  |
|     |         | 125      | 114                | 125                | 125   | 125   | 125                | 125   | 125   | 125                | 116                | 125    |
| 2   | AY.98   | T19R     | G142D <sup>d</sup> | ΔE156              | ΔF157 | R158G | L452R              | T478K | D614G | P681R              | D950N              |        |
|     |         | 2        | 1                  | 2                  | 2     | 2     | 2                  | 2     | 2     | 2                  | 2                  |        |
| 8   | AY.98.1 | T19R     | ΔE156              | ΔF157              | R158G | P251L | L452R              | T478K | D614G | P681R              | D950N              |        |
|     |         | 8        | 8                  | 8                  | 8     | 8     | 8                  | 8     | 8     | 8                  | 7                  |        |
| 1   | AY.103  | T19R     | G142D              | ΔE156              | ΔF157 | R158G | L452R              | T478K | D614G | P681R              | D950N              |        |
|     |         | 1        | 1                  | 1                  | 1     | 1     | 1                  | 1     | 1     | 1                  | 1                  |        |
| 3   | AY.120  | T19R     | T95I               | G142D <sup>d</sup> | ΔE156 | ΔF157 | R158G              | L452R | T478K | D614G              | P681R <sup>d</sup> | D950N  |
|     |         | 3        | 3                  | 2                  | 3     | 3     | 3                  | 3     | 3     | 3                  | 2                  | 3      |
| 364 | AY.122  | T19R     | G142D              | ΔE156              | ΔF157 | R158G | L452R              | T478K | D614G | P681R              | D950N              |        |
|     |         | 364      | 287                | 362                | 362   | 362   | 364                | 364   | 364   | 326                | 361                |        |
| 3   | AY.125  | T19R     | T95I               | ΔE156              | ΔF157 | R158G | L452R              | T478K | D614G | P681R              | D950N              |        |
|     |         | 3        | 3                  | 3                  | 3     | 3     | 3                  | 3     | 3     | 3                  | 3                  |        |
| 3   | AY.126  | T19R     | T95I               | ΔE156              | ΔF157 | R158G | L452R              | T478K | D614G | P681R <sup>d</sup> | I850L              | D950N  |
|     |         | 3        | 3                  | 3                  | 3     | 3     | 3                  | 3     | 3     | 2                  | 3                  | 3      |
| 4   | AY.128  | T19R     | T95I               | ΔE156              | ΔF157 | R158G | A435S <sup>f</sup> | L452R | T478K | D614G              | P681R              | D950N  |
|     |         | 4        | 3                  | 4                  | 4     | 4     | 4                  | 4     | 4     | 4                  | 4                  | 4      |

<sup>a</sup>The most prevalent mutations shown in Table S1 were determined in accordance to the most prevalent mutations of these lineages in this dataset, and as denoted by the CoV-Spectrum

[1](<https://cov-spectrum.org/>)(date accessed 30 May 2022) and Outbreak.info (<https://outbreak.info/>)(date accessed 30 May 2022) websites[2].

<sup>b</sup>Total number of sequences that were identified for each lineage in this dataset.

<sup>c</sup>For lineages that were identified in lower frequency in this dataset, the CoV-Spectrum [1](<https://cov-spectrum.org/>)(date accessed 30 May 2022) and Outbreak.info (<https://outbreak.info/>)(date accessed 30 May 2022) websites[2] were used to indicate the expected common mutations and deletions

<sup>d</sup>Mutations that are listed as common (above 75% prevalence) by CoV-Spectrum [1](<https://cov-spectrum.org/>)(date accessed 30 May 2022) and Outbreak.info (<https://outbreak.info/>)(date accessed 30 May 2022) websites[2], for a specific lineage but were found in lower frequencies (below 75%) in this dataset.

<sup>e</sup>The mutations and deletions  $\Delta$ E156,  $\Delta$ F157 and R158G are sometimes listed as E156G,  $\Delta$ F157 and  $\Delta$ R158 <https://covariants.org/variants/21A.Delta> (date accessed 31 May 2022) [3,4].

<sup>f</sup>Mutations that are listed as below 75% prevalence in CoV-Spectrum [1](<https://cov-spectrum.org/>)(date accessed 30 May 2022) and Outbreak.info (<https://outbreak.info/>)(date accessed 30 May 2022) websites[2], but were found in higher frequencies (above 75%) in this dataset for specific lineages.

Table S2. Uncommon S-protein mutations of B.1.258 & sublineages, Alpha (B.1.1.7 & Q. sublineages), and Delta (B.1.617.2 & sublineages AY.) that were identified in this dataset<sup>a</sup>

| Total Sequences <sup>b</sup> | Lineage   | Mutations and Number of Sequences Identified for Each Mutation |        |        |        |        |        |        |        |        |        |        |
|------------------------------|-----------|----------------------------------------------------------------|--------|--------|--------|--------|--------|--------|--------|--------|--------|--------|
| 258                          | B.1.258   | S12F                                                           | G75V   | T95I   | ΔD138  | ΔP139  | ΔF140  | ΔL141  | ΔG142  | ΔV143  | ΔY144  | ΔY145  |
|                              |           | 1                                                              | 1      | 4      | 1      | 1      | 1      | 1      | 1      | 1      | 2      | 1      |
|                              |           | R158G                                                          | M177I  | L179F  | G199V  | S221L  | S256L  | W258L  | E281K  | T299I  | F490S  | K529N  |
|                              |           | 1                                                              | 2      | 1      | 1      | 1      | 10     | 1      | 30     | 12     | 1      | 1      |
|                              |           | T547I                                                          | E654Q  | H655Y  | T678I  | N703Y  | P715S  | P793S  | D808N  | S813I  | A845V  | A846V  |
|                              |           | 1                                                              | 5      | 1      | 1      | 5      | 1      | 1      | 1      | 1      | 1      | 1      |
|                              |           | A893S                                                          | D936Y  | S968A  | K1045R | A1078V | W1102L | D1118Y | D1163Y | V1176F | L1203F |        |
|                              |           | 4                                                              | 1      | 4      | 1      | 4      | 4      | 1      | 4      | 5      | 2      |        |
| 690                          | B.1.1.7   | L5F                                                            | L8F    | S13I   | T20I   | T22I   | P26L   | ΔV42   | ΔF43   | ΔR44   | ΔS45   | ΔS46   |
|                              |           | 6                                                              | 1      | 1      | 1      | 3      | 1      | 1      | 1      | 1      | 1      | 1      |
|                              |           | A67V                                                           | V90F   | S98F   | D138H  | ΔG142  | Y144V  | N148T  | F157L  | S162I  | Q173K  | E180K  |
|                              |           | 1                                                              | 1      | 1      | 1      | 1      | 1      | 1      | 93     | 1      | 1      | 1      |
|                              |           | G181V                                                          | V213L  | D215Y  | L216F  | G219D  | G261V  | P272L  | V308L  | P330S  | V362F  | V367F  |
|                              |           | 1                                                              | 2      | 1      | 1      | 1      | 1      | 4      | 1      | 1      | 1      | 1      |
|                              |           | L390F                                                          | E309A  | G413R  | S494P  | G496S  | A520S  | L552F  | T553I  | D568N  | T572I  | E583D  |
|                              |           | 1                                                              | 7      | 9      | 1      | 1      | 1      | 1      | 1      | 1      | 1      | 3      |
|                              |           | T618I                                                          | A626V  | F643L  | A653V  | E654Q  | Q677H  | A684V  | V687I  | A694S  | S704L  | V705F  |
|                              |           | 1                                                              | 1      | 2      | 1      | 1      | 1      | 2      | 2      | 8      | 1      | 1      |
|                              |           | E748Q                                                          | L752F  | T778I  | A783S  | P812S  | D830Y  | A831V  | M869I  | A871S  | A879V  | A893V  |
|                              |           | 4                                                              | 1      | 1      | 1      | 1      | 1      | 58     | 1      | 1      | 1      | 1      |
|                              |           | A924S                                                          | A924V  | A930V  | L938F  | S939F  | M1050I | V1065A | A1078V | D1084E | A1087S | R1091H |
|                              |           | 1                                                              | 1      | 1      | 1      | 1      | 2      | 1      | 1      | 6      | 7      | 1      |
|                              |           | D1163H                                                         | G1167V | E1195Q | Q1201H | L1203F | G1219C | G1219V | M1229I | M1229T | V1230L | C1243F |
|                              |           | 1                                                              | 5      | 1      | 1      | 1      | 3      | 6      | 2      | 1      | 7      | 1      |
| 41                           | B.1.617.2 | T95I                                                           | D111N  | Y145H  | A222V  | D253G  | T572I  | Q613H  | Q677H  | N703S  | V772I  | M1237I |
|                              |           | 24                                                             | 1      | 1      | 6      | 1      | 1      | 1      | 4      | 2      | 1      | 1      |
|                              |           | K1255I                                                         | V1264L |        |        |        |        |        |        |        |        |        |
|                              |           | 1                                                              | 4      |        |        |        |        |        |        |        |        |        |
| 56                           | AY.4      | A67V                                                           | Q183R  | V213L  | G446V  | L455F  | N532Y  | K558N  | H655Y  | T859I  | A892V  | A1087S |
|                              |           | 1                                                              | 4      | 1      | 1      | 1      | 1      | 1      | 3      | 1      | 1      | 1      |
|                              |           | D1163Y                                                         | P1263L | V1264L |        |        |        |        |        |        |        |        |

[illegible]

|   |        | Y636N  | A647S  | A653V  | Q677H  | S680T  | A684V  | A701V  | R765C  | G769V  | I805V  | P812S  |
|---|--------|--------|--------|--------|--------|--------|--------|--------|--------|--------|--------|--------|
|   |        | 1      | 1      | 3      | 1      | 1      | 1      | 1      | 2      | 2      | 1      | 1      |
|   |        | S929I  | S937T  | S940F  | A1070V | A1078S | V1104L | G1124V | D1153Y | V1176F | V1177L | Y1215H |
|   |        | 1      | 1      | 1      | 1      | 1      | 1      | 1      | 1      | 2      | 7      | 1      |
|   |        | G1219V | M1229I | C1243F | K1245N | C1250F | C1250Y |        |        |        |        |        |
|   |        | 1      | 2      | 1      | 1      | 1      | 1      |        |        |        |        |        |
| 3 | AY.125 | G142D  |        |        |        |        |        |        |        |        |        |        |
|   |        | 1      |        |        |        |        |        |        |        |        |        |        |
| 3 | AY.126 | G142D  | E281Q  |        |        |        |        |        |        |        |        |        |
|   |        | 1      | 1      |        |        |        |        |        |        |        |        |        |

<sup>a</sup>The uncommon mutations shown in Table S2 were determined in accordance to the uncommon mutations of the lineages in this dataset, and as denoted by the CoV-Spectrum [1](<https://cov-spectrum.org/>)(date accessed 30 May 2022) and Outbreak.info (<https://outbreak.info/>)(date accessed 30 May 2022) websites[2].

<sup>b</sup>Total number of sequences that were identified for each lineage in this dataset.

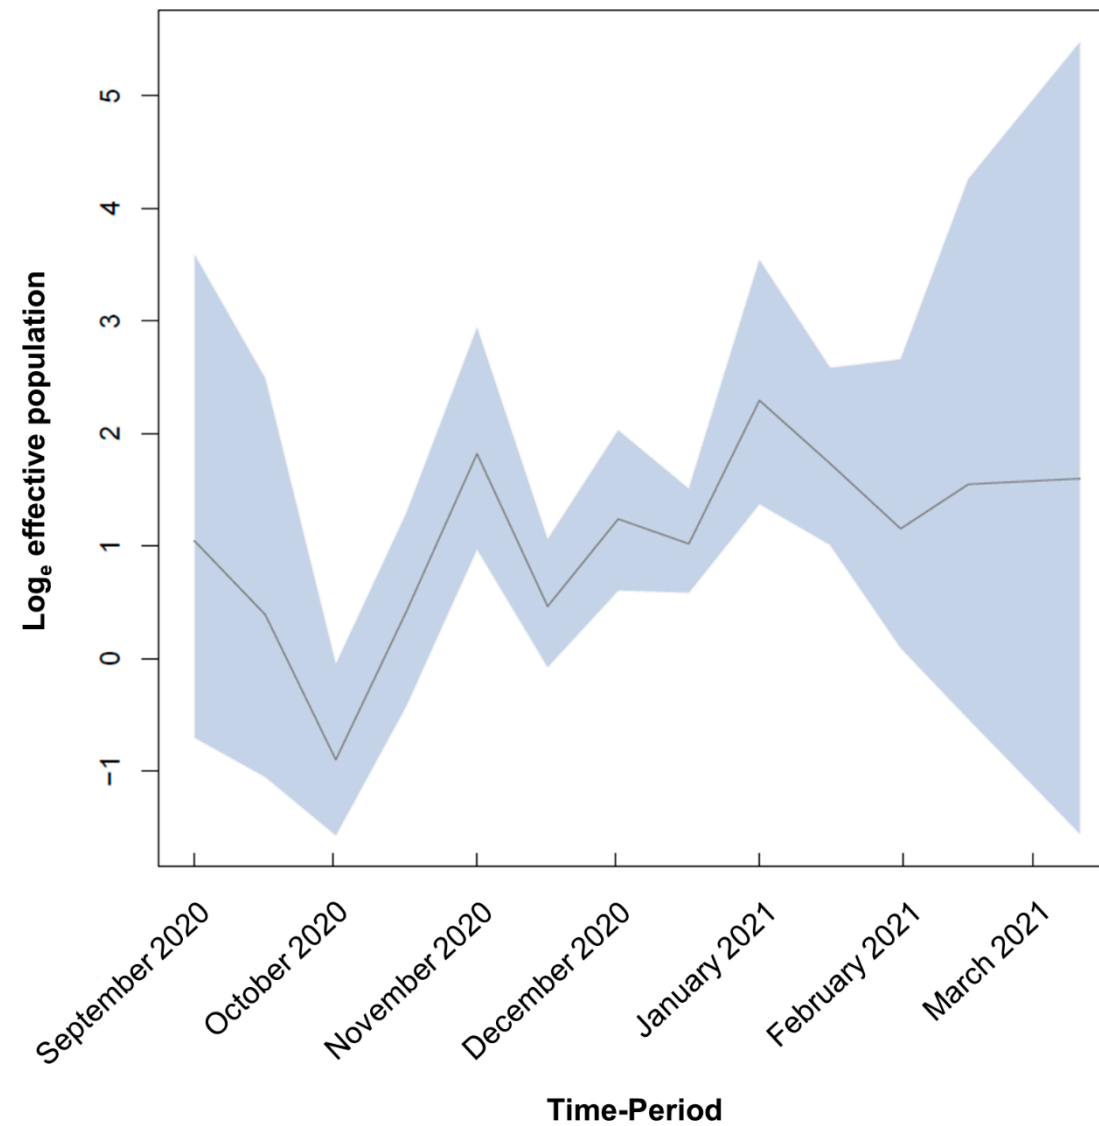

**Figure S1.** Population size changes in the large Cyprus-specific B.1.258 transmission lineage. The solid black line represents the estimated mean of the effective population size on a  $\log_e$  scale (represented by the  $y$ -axis) through the sampling period from September 2020 to March 2021 (represented by the  $x$ -axis). The effective population size can be thought of as the number of individuals who contribute offspring to the descending generation. The blue-shaded area marks the associated 95% HPD interval.

# Alpha (B.1.1.7 & Q. sublineages)

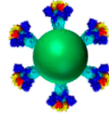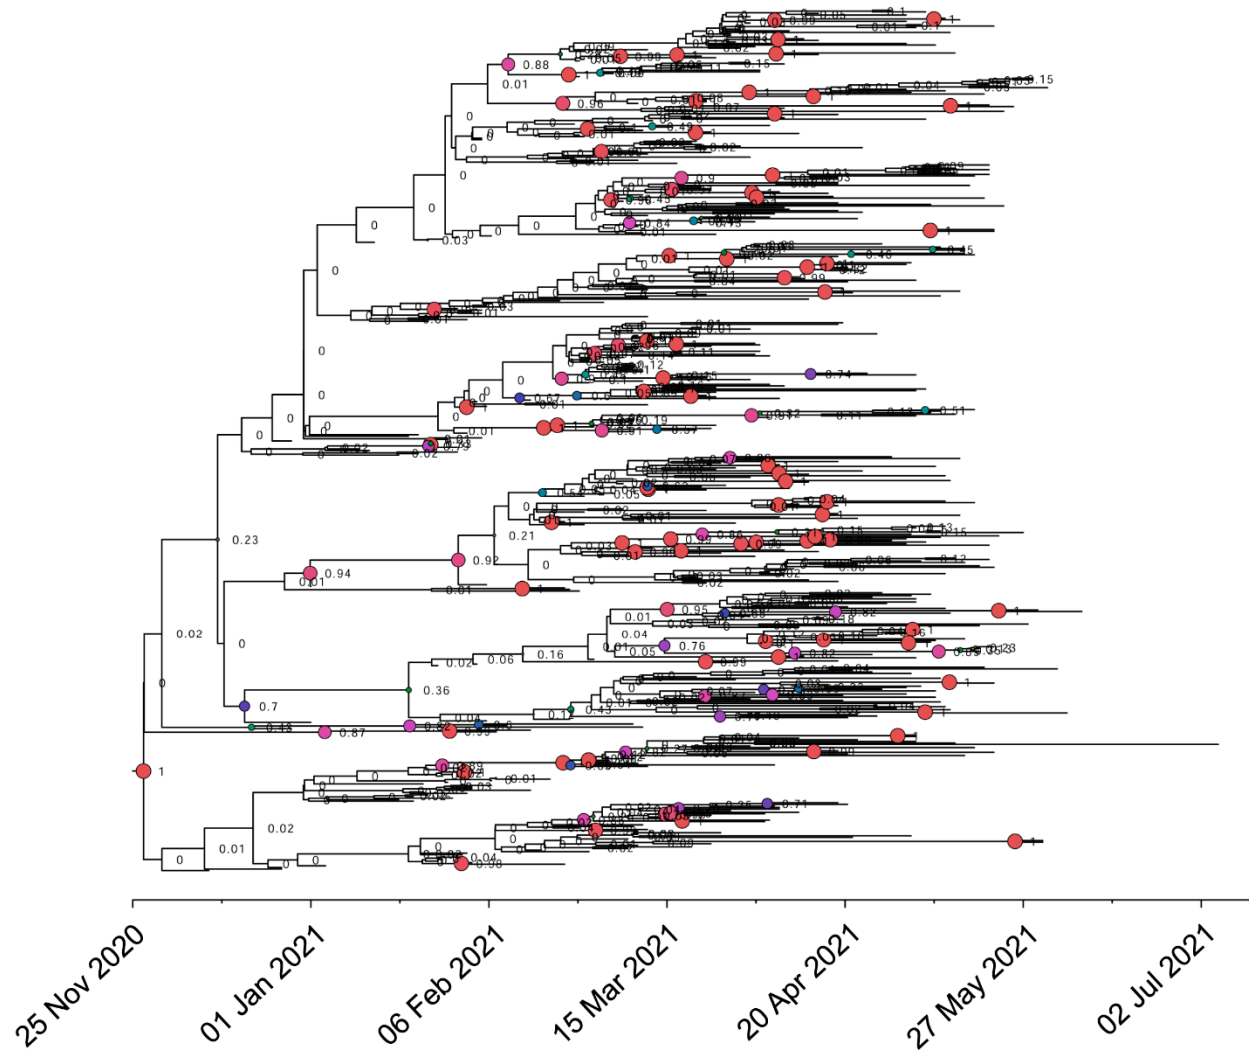

**Figure S2.** Maximum clade credibility summary tree of the large Cypriot-specific clade in the ML tree estimated from the Alpha (B.1.1.7 & Q. sublineages) data set. Several of the internal nodes that define large subclades are well-supported (red circles indicate high support of 1).



## Delta (B.1.617.2 & AY. sublineages)

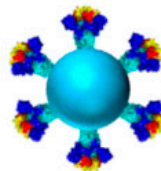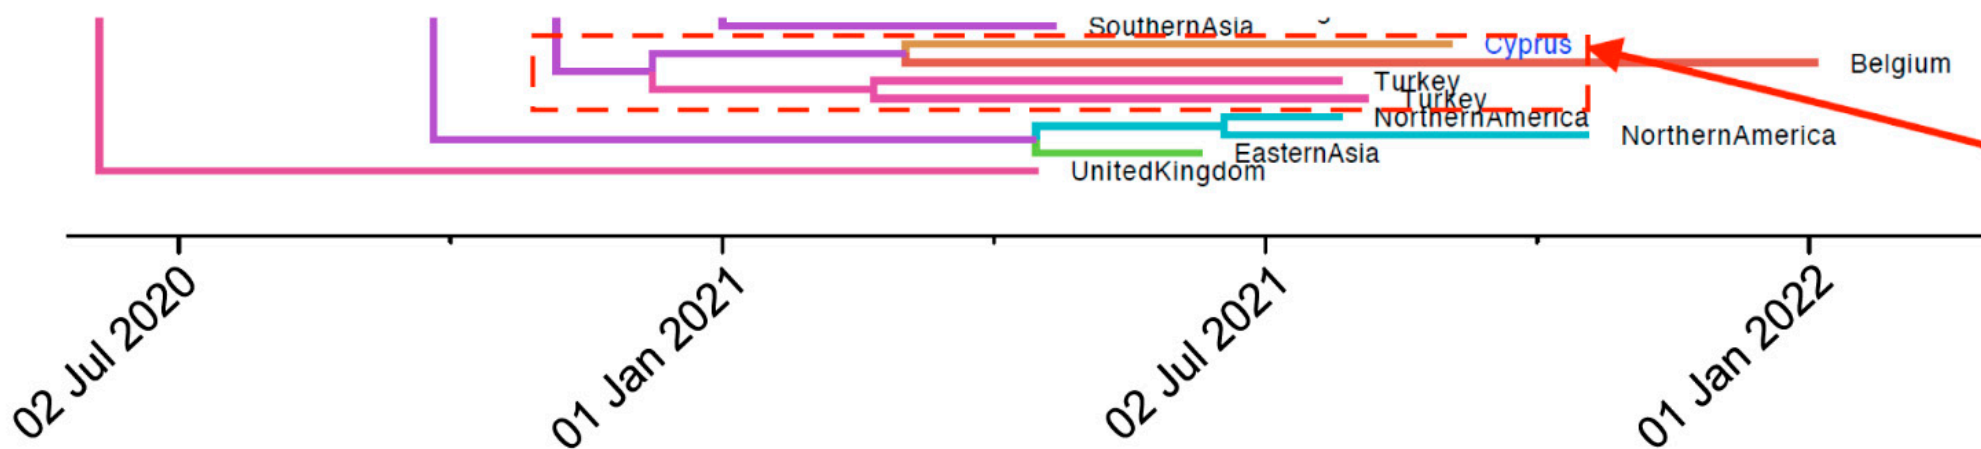

**Figure S3.** Inset of the Delta (B.1.617.2 & AY. sublineages) MCC summary tree. Branches in the dashed box are long and mostly represent several months of evolution. The red arrow indicates the Cypriot taxon that underlies the early estimate of the first introduction date of Delta into Cyprus. This figure is supplementary to Figure 6 (C) that shows the time-scaled migration history for the dataset of Delta (B.1.617.2 & AY. sublineages).

## References

1. Chen, C.; Nadeau, S.; Yared, M.; Voinov, P.; Xie, N.; Roemer, C.; Stadler, T. CoV-Spectrum: analysis of globally shared SARS-CoV-2 data to identify and characterize new variants. *Bioinformatics* **2022**, *38*, 1735–1737, doi:10.1093/bioinformatics/btab856.
2. Julia L. Mullen, Ginger Tsueng, Alaa Abdel Latif, Manar Alkuzweny, Marco Cano, Emily Haag, Jerry Zhou, Mark Zeller, Emory Hufbauer, Nate Matteson, Kristian G. Andersen, Chunlei Wu, Andrew I. Su, Karthik Gangavarapu, Laura D. Hughes, and the C. for V.S.B. outbreak.info Available online: <https://outbreak.info/> (accessed on May 30, 2022).
3. Hodcroft, E.B. CoVariants: SARS-CoV-2 Mutations and Variants of Interest Available online: <https://covariants.org/> (accessed on May 30, 2022).
4. Suratekar, R.; Ghosh, P.; Niesen, M.J.M.; Donadio, G.; Anand, P.; Soundararajan, V.; Venkatakrisnan, A.J. High diversity in Delta variant across countries revealed by genome-wide analysis of SARS-CoV-2 beyond the Spike protein. *Mol. Syst. Biol.* **2022**, doi:10.15252/msb.202110673.
